# Supplementary figures and images for: RNA Sequencing-Based Identification of Ganglioside GD2-Positive Cancer Phenotype
Source: MDPI journal article supplement (doi:10.3390/biomedicines8060142), 2020-05-30

Log<sub>10</sub>(sum of gene expression)

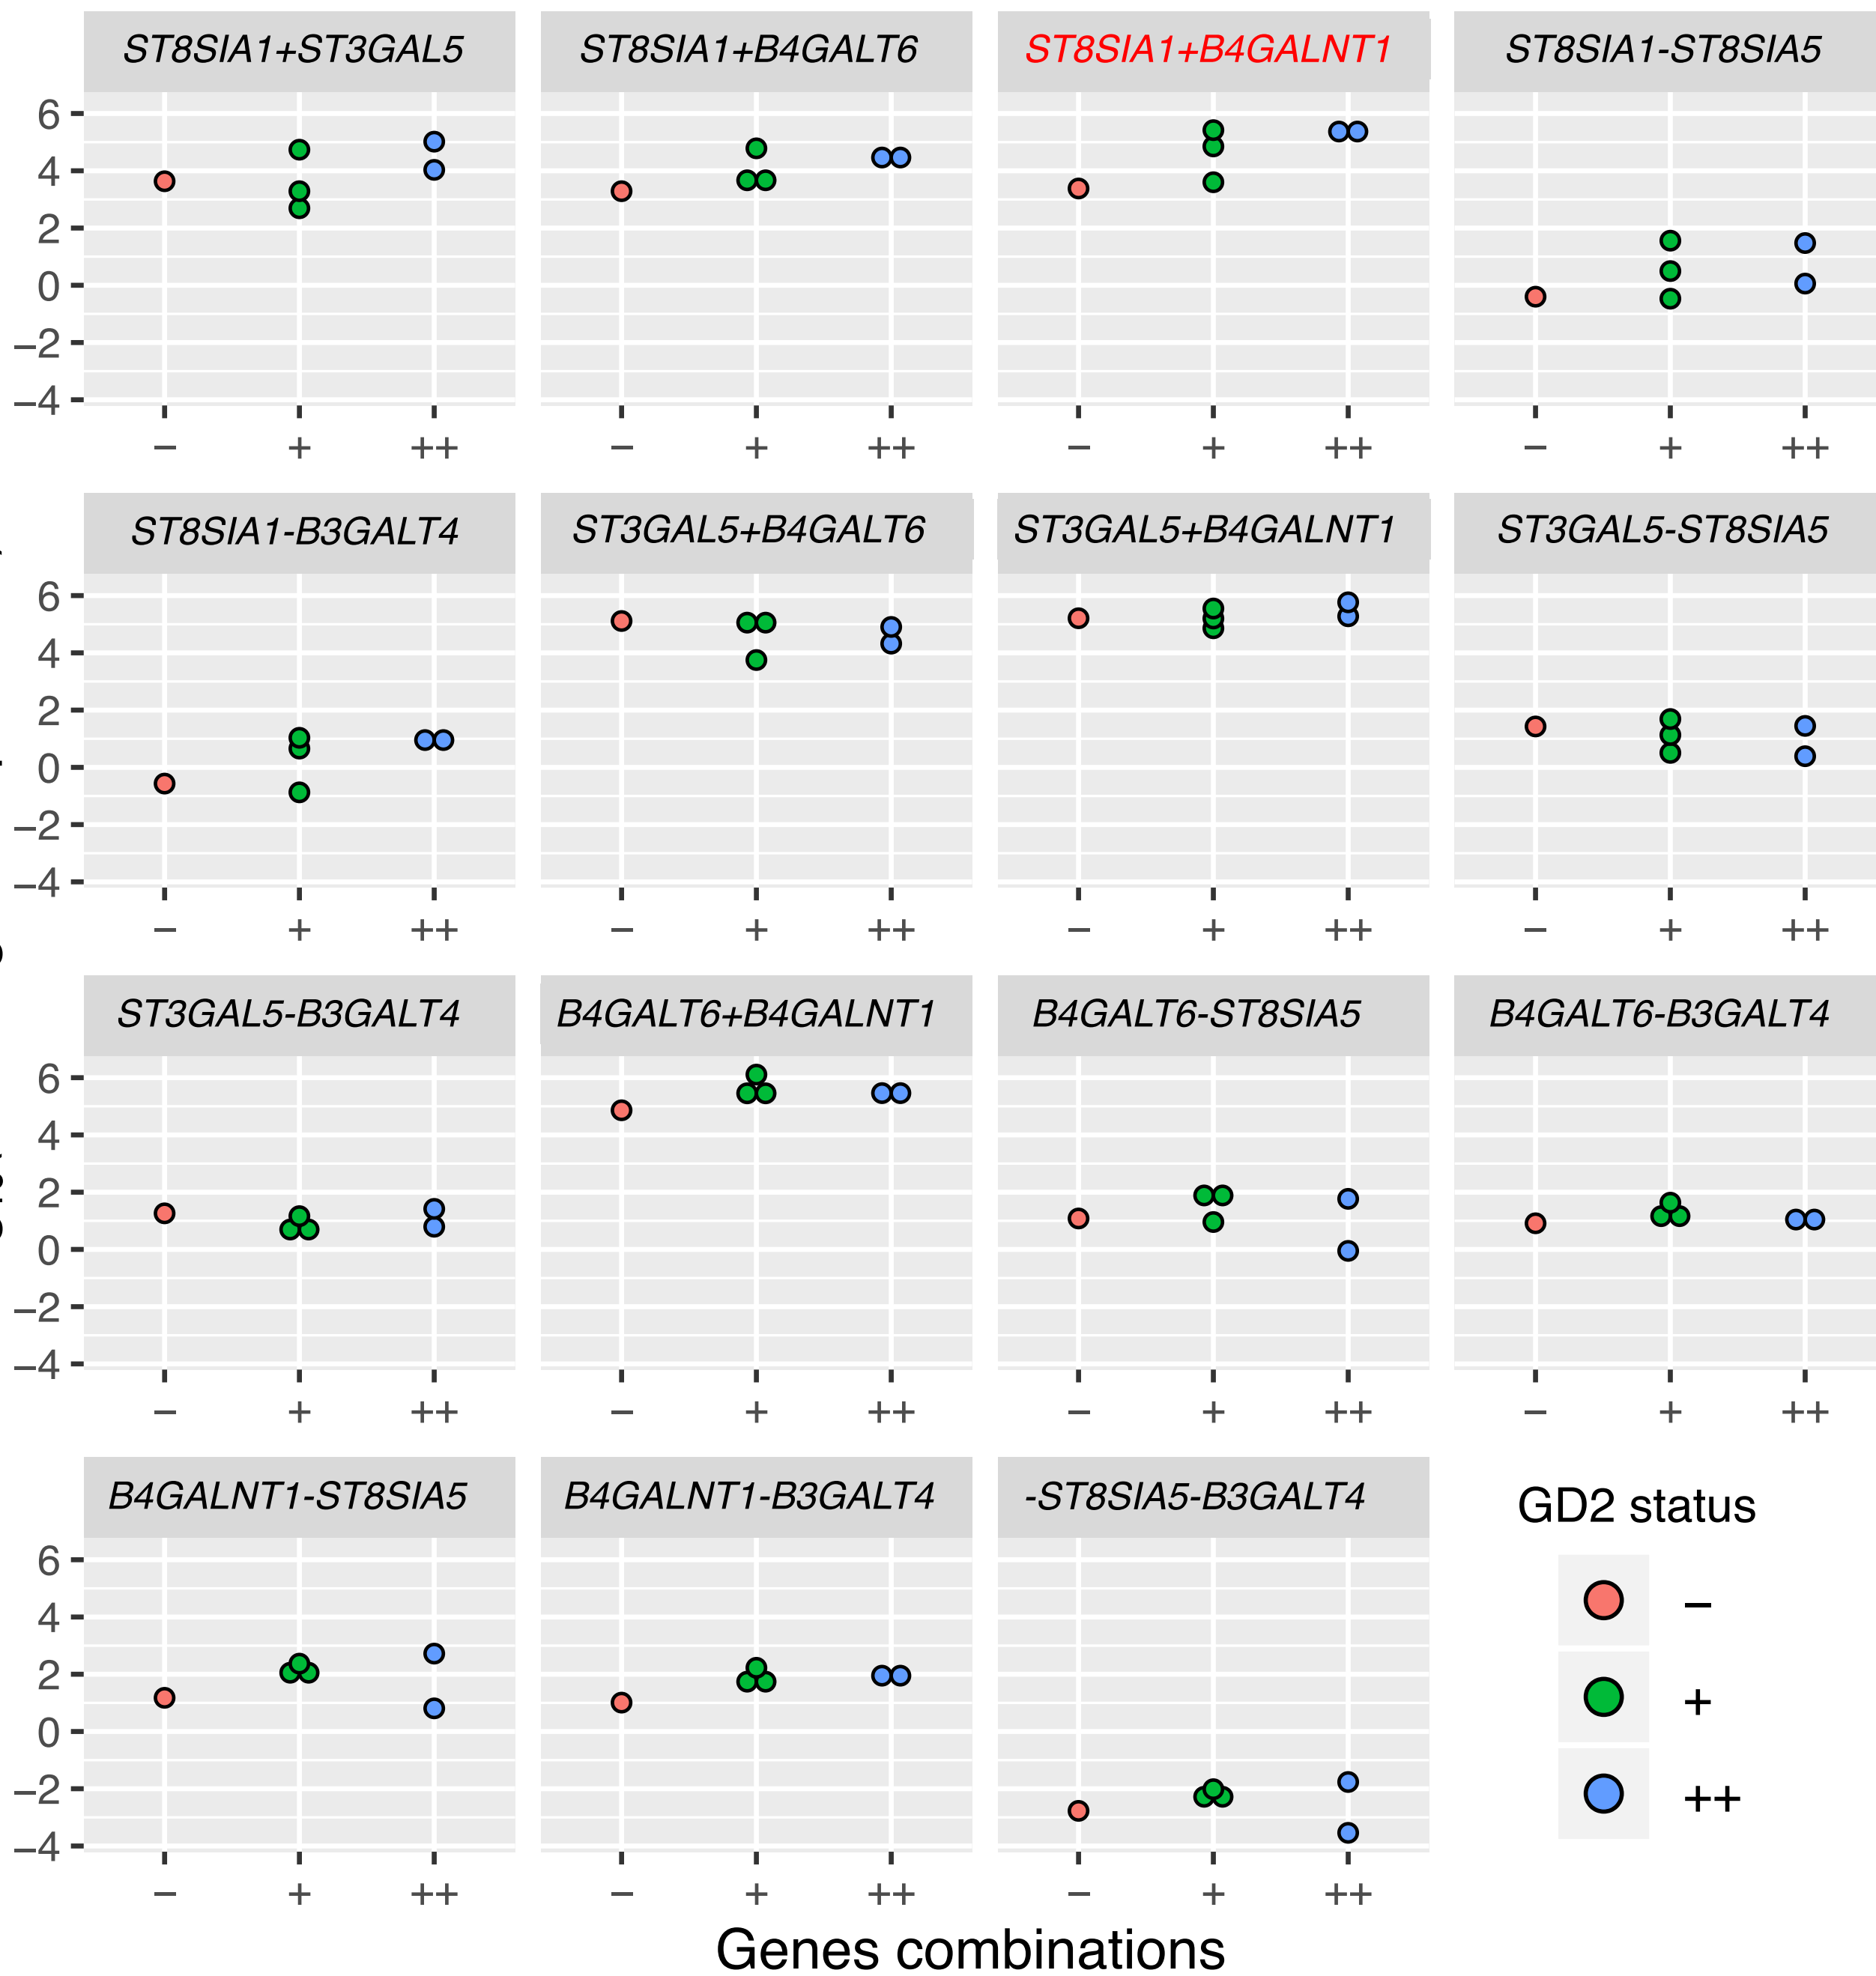

Supplement: s1 [file s1]
